# Supplementary material for: Variation in hybridogenetic hybrid emergence between populations of water frogs from the Pelophylax esculentus complex
Source: PubMed Central journal article supplement (PMC6824575; doi:10.1371/journal.pone.0224759), 2019-11-01
Supplement: pone.0224759.s001.pdf [file pone.0224759.s001.pdf]

**S1 Table 1**

| Successful crosses |                      |             |     |                                 |            |                                  |                          |
|--------------------|----------------------|-------------|-----|---------------------------------|------------|----------------------------------|--------------------------|
| No                 | Frog`s species       | Genome size | Sex | Methods of frogs identification | Frogs id   | Locality                         | Coordinates              |
| 1                  | <i>P. ridibundus</i> | 16,352      | f   | DNA flow cytometry              | 6_2015_f   | Chermyshevo                      | 56.196386 N, 46.519268 E |
| 2                  | <i>P. lessonae</i>   | 13,930      | m_1 | DNA flow cytometry              | 6_2015_m1  | Chermyshevo                      | 56.196386 N, 46.519268 E |
| 3                  | <i>P. lessonae</i>   | 13,905      | m_2 | DNA flow cytometry              | 6_2015_m2  | Chermyshevo                      | 56.196386 N, 46.519268 E |
| 4                  | <i>P. ridibundus</i> | 16,123      | f   | DNA flow cytometry              | 16_2015_f  | Medvedevo                        | 56.641235 N, 47.752490 E |
| 5                  | <i>P. lessonae</i>   |             | m   | Karyotyping with FISH           | 16_2015_m  | Krasnooktyabr'skiy               | 56.681029 N, 47.678995 E |
| 6                  | <i>P. ridibundus</i> |             | f   | Karyotyping with FISH           | 11_2016_f  | Medvedevo                        | 56.641235 N, 47.752490 E |
| 7                  | <i>P. lessonae</i>   |             | m   | Karyotyping with FISH           | 11_2016_m1 | Kuguvan                          | 56.786141 N, 47.784421 E |
| 8                  | <i>P. lessonae</i>   |             | m   | Karyotyping with FISH           | 11_2016_m2 | Krasnooktyabr'skiy               | 56.681029 N, 47.678995 E |
| 9                  | <i>P. ridibundus</i> |             | f   | Karyotyping with FISH           | 13_2016_f1 | Medvedevo                        | 56.641235 N, 47.752490 E |
| 10                 | <i>P. lessonae</i>   |             | m   | Karyotyping with FISH           | 13_2016_m1 | Kuguvan                          | 56.786141 N, 47.784421 E |
| 11                 | <i>P. lessonae</i>   |             | m   | Karyotyping with FISH           | 13_2016_m2 | Kuguvan                          | 56.786141 N, 47.784421 E |
| 12                 | <i>P. lessonae</i>   |             | f   | Karyotyping with FISH           | 1_2017_f   | Pyn'zhedur                       | 56.613111 N, 47.931808 E |
| 13                 | <i>P. ridibundus</i> |             | m   | Karyotyping with FISH           | 1_2017_m   | Sosnovaya Roszha,<br>Yoshkar-Ola | 56.281948 N, 46.898717 E |
| 14                 | <i>P. lessonae</i>   |             | f   | Karyotyping with FISH           | 11_2015_f  | Kuguvan                          | 56.786141 N, 47.784421 E |
| 15                 | <i>P. esculentus</i> | 14,968      | m   | DNA flow cytometry              | 11_2015_m  | Kuguvan                          | 56.786141 N, 47.784421 E |
| 16                 | <i>P. lessonae</i>   | 13,801      | f   | DNA flow cytometry              | 12_2015_f  | Kuguvan                          | 56.786141 N, 47.784421 E |
| 17                 | <i>P. esculentus</i> | 14,969      | m   | DNA flow cytometry              | 12_2015_m  | Kuguvan                          | 56.786141 N, 47.784421 E |
| 18                 | <i>P. lessonae</i>   |             | f   | Karyotyping with FISH           | 13_2015_f  | Kuguvan                          | 56.786141 N, 47.784421 E |
| 19                 | <i>P. esculentus</i> | 14,975      | m   | DNA flow cytometry              | 13_2015_m  | Kuguvan                          | 56.786141 N, 47.784421 E |
| 20                 | <i>P. lessonae</i>   | 13,758      | f   | DNA flow cytometry              | 14_2015_f  | Kuguvan                          | 56.786141 N, 47.784421 E |
| 21                 | <i>P. esculentus</i> | 14,986      | m   | DNA flow cytometry              | 14_2015_m  | Kuguvan                          | 56.786141 N, 47.784421 E |
| 22                 | <i>P. lessonae</i>   | 13,700      | f   | DNA flow cytometry              | 26_2015_f  | Shusher                          | 56.672423 N, 47.261847 E |
| 23                 | <i>P. esculentus</i> | 14,948      | m   | DNA flow cytometry              | 26_2015_m  | Kuguvan                          | 56.786141 N, 47.784421 E |
| 24                 | <i>P. lessonae</i>   | 13,883      | f   | DNA flow cytometry              | 27_2015_f  | Kuguvan                          | 56.786141 N, 47.784421 E |
| 25                 | <i>P. esculentus</i> | 14,959      | m   | DNA flow cytometry              | 27_2015_m  | Kuguvan                          | 56.786141 N, 47.784421 E |
| 26                 | <i>P. lessonae</i>   |             | f   | Karyotyping with FISH           | 5_2016_f   | Kuguvan                          | 56.786141 N, 47.784421 E |

|    |                      |        |     |                           |            |                    |                          |
|----|----------------------|--------|-----|---------------------------|------------|--------------------|--------------------------|
| 27 | <i>P. esculentus</i> |        | m   | Karyotyping with FISH     | 5_2016_m   | Kuguvan            | 56.786141 N, 47.784421 E |
| 28 | <i>P. lessonae</i>   |        | f   | Karyotyping with FISH     | 6_2016_f   | Krasnooktyabr'skiy | 56.681029 N, 47.678995 E |
| 29 | <i>P. esculentus</i> |        | m   | Karyotyping with FISH     | 6_2016_m   | Kuguvan            | 56.786141 N, 47.784421 E |
| 30 | <i>P. lessonae</i>   | 13,795 | f   | DNA flow cytometry        | 19_2015_f  | Shusher            | 56.672423 N, 47.261847 E |
| 31 | <i>P. esculentus</i> | 15,137 | m   | DNA flow cytometry        | 19_2015_m  | Krasnooktyabr'skiy | 56.681029 N, 47.678995 E |
| 32 | <i>P. lessonae</i>   | 13,785 | f_1 | DNA flow cytometry        | 30_2015_f1 | Chermyshevo        | 56.196386 N, 46.519268 E |
| 33 | <i>P. lessonae</i>   | 13,811 | f_2 | DNA flow cytometry        | 30_2015_f2 | Chermyshevo        | 56.196386 N, 46.519268 E |
| 34 | <i>P. esculentus</i> | 15,035 | m   | DNA flow cytometry        | 30_2015_m  | Chermyshevo        | 56.196386 N, 46.519268 E |
| 35 | <i>P. lessonae</i>   |        | f   | Morphological examination | 2_2017_f   | Pyn'zhedur         | 56.613111 N, 47.931808 E |
| 36 | <i>P. lessonae</i>   |        | m   | Morphological examination | 2_2017_m   | Pyn'zhedur         | 56.613111 N, 47.931808 E |

| Unsuccessful crosses |                      |             |     |                                 |           |                    |                          |
|----------------------|----------------------|-------------|-----|---------------------------------|-----------|--------------------|--------------------------|
| №                    | Frog`s species       | Genome size | Sex | methods of frogs identification | Frogs id  | Locality           | Coordinates              |
| 1                    | <i>P. lessonae</i>   | 13,916      | f   | DNA flow cytometry              | 10_2015_f | Shusher            | 56.672423 N, 47.261847 E |
| 2                    | <i>P. ridibundus</i> | 16,368      | m   | DNA flow cytometry              | 10_2015_m | Medvedevo          | 56.641235 N, 47.752490 E |
| 3                    | <i>P. ridibundus</i> |             | f   | Karyotyping with FISH           | 17_2015_f | Medvedevo          | 56.641235 N, 47.752490 E |
| 4                    | <i>P. lessonae</i>   | 13,791      | m   | DNA flow cytometry              | 17_2015_m | Krasnooktyabr'skiy | 56.681029 N, 47.678995 E |
| 5                    | <i>P. ridibundus</i> | 16,116      | f   | DNA flow cytometry              | 28_2015_f | Medvedevo          | 56.641235 N, 47.752490 E |
| 6                    | <i>P. lessonae</i>   | 13,682      | m   | DNA flow cytometry              | 28_2015_m | Kuguvan            | 56.786141 N, 47.784421 E |
| 7                    | <i>P. esculentus</i> | 15,178      | f   | DNA flow cytometry              | 1_2015_f  | Kuguvan            | 56.786141 N, 47.784421 E |
| 8                    | <i>P. lessonae</i>   | 14,045      | m   | DNA flow cytometry              | 1_2015_m  | Kuguvan            | 56.786141 N, 47.784421 E |
| 9                    | <i>P. esculentus</i> | 15,145      | f   | DNA flow cytometry              | 2_2015_f  | Kuguvan            | 56.786141 N, 47.784421 E |
| 10                   | <i>P. lessonae</i>   | 13,984      | m   | DNA flow cytometry              | 2_2015_m  | Kuguvan            | 56.786141 N, 47.784421 E |
| 11                   | <i>P. esculentus</i> | 15,167      | f   | DNA flow cytometry              | 3_2015_f  | Kuguvan            | 56.786141 N, 47.784421 E |
| 12                   | <i>P. lessonae</i>   | 13,927      | m   | DNA flow cytometry              | 3_2015_m  | Kuguvan            | 56.786141 N, 47.784421 E |
| 13                   | <i>P. esculentus</i> | 15,103      | f   | DNA flow cytometry              | 4_2015_f  | Kuguvan            | 56.786141 N, 47.784421 E |
| 14                   | <i>P. lessonae</i>   |             | m   | Karyotyping with FISH           | 4_2015_m  | Kuguvan            | 56.786141 N, 47.784421 E |
| 15                   | <i>P. esculentus</i> | 14,966      | f   | DNA flow cytometry              | 7_2015_f  | Oshlamoochash      | 56.812210 N, 47.760231 E |
| 16                   | <i>P. lessonae</i>   | 13,627      | m   | DNA flow cytometry              | 7_2015_m  | Krasnooktyabr'skiy | 56.681029 N, 47.678995 E |
| 17                   | <i>P. esculentus</i> | 14,876      | f   | DNA flow cytometry              | 22_2015_f | Krasnooktyabr'skiy | 56.681029 N, 47.678995 E |

|    |                      |        |     |                    |            |                    |                          |
|----|----------------------|--------|-----|--------------------|------------|--------------------|--------------------------|
| 18 | <i>P. esculentus</i> | 14,927 | m   | DNA flow cytometry | 22_2015_m  | Shusher            | 56.672423 N, 47.261847 E |
| 19 | <i>P. lessonae</i>   | 13,668 | f_1 | DNA flow cytometry | 24_2015_f1 | Krasnooktyabr'skiy | 56.681029 N, 47.678995 E |
| 20 | <i>P. lessonae</i>   | 13,673 | f_2 | DNA flow cytometry | 24_2015_f2 | Krasnooktyabr'skiy | 56.681029 N, 47.678995 E |
| 21 | <i>P. esculentus</i> | 14,913 | m   | DNA flow cytometry | 24_2015_m1 | Shusher            | 56.672423 N, 47.261847 E |
| 22 | <i>P. lessonae</i>   | 13,684 | f   | DNA flow cytometry | 31_2015_f1 | Kuguvan            | 56.786141 N, 47.784421 E |
| 23 | <i>P. lessonae</i>   | 13,724 | f   | DNA flow cytometry | 31_2015_f2 | Kuguvan            | 56.786141 N, 47.784421 E |
| 24 | <i>P. esculentus</i> | 14,805 | m   | DNA flow cytometry | 31_2015_m1 | Oshlamoochash      | 56.812210 N, 47.760231 E |
| 25 | <i>P. lessonae</i>   | 13,705 | f   | DNA flow cytometry | 32_2015_f  | Kuguvan            | 56.786141 N, 47.784421 E |
| 26 | <i>P. esculentus</i> | 14,869 | m   | DNA flow cytometry | 32_2015_m  | Oshlamoochash      | 56.812210 N, 47.760231 E |
| 27 | <i>P. lessonae</i>   | 13,714 | f   | DNA flow cytometry | 34_2015_f  | Chermyshevo        | 56.196386 N, 46.519268 E |
| 28 | <i>P. esculentus</i> | 15,001 | m   | DNA flow cytometry | 34_2015_m  | Kuguvan            | 56.786141 N, 47.784421 E |
| 29 | <i>P. ridibundus</i> | 16,079 | f   | DNA flow cytometry | 37_2015_f  | Chermyshevo        | 56.196386 N, 46.519268 E |
| 30 | <i>P. esculentus</i> | 14,922 | m   | DNA flow cytometry | 37_2015_m  | Kuguvan            | 56.786141 N, 47.784421 E |
| 31 | <i>P. lessonae</i>   | 13,767 | f   | DNA flow cytometry | 15_2016_f  | Kuguvan            | 56.786141 N, 47.784421 E |
| 32 | <i>P. esculentus</i> | 15,065 | m   | DNA flow cytometry | 15_2016_m  | Kuguvan            | 56.786141 N, 47.784421 E |
| 33 | <i>P. esculentus</i> | 15,129 | f   | DNA flow cytometry | 5_2015_f   | Chermyshevo        | 56.196386 N, 46.519268 E |
| 34 | <i>P. ridibundus</i> | 16,312 | m   | DNA flow cytometry | 5_2015_m   | Oshlamoochash      | 56.812210 N, 47.760231 E |
| 35 | <i>P. esculentus</i> | 15,169 | f   | DNA flow cytometry | 8_2015_f   | Medvedevo          | 56.641235 N, 47.752490 E |
| 36 | <i>P. lessonae</i>   | 14,013 | m   | DNA flow cytometry | 8_2015_m   | Medvedevo          | 56.641235 N, 47.752490 E |
| 37 | <i>P. esculentus</i> | 14,922 | f   | DNA flow cytometry | 9_2015_f   | Krasnooktyabr'skiy | 56.681029 N, 47.678995 E |
| 38 | <i>P. lessonae</i>   | 13,817 | m   | DNA flow cytometry | 9_2015_m   | Krasnooktyabr'skiy | 56.681029 N, 47.678995 E |
| 39 | <i>P. esculentus</i> | 14,922 | f   | DNA flow cytometry | 23_2015_f  | Krasnooktyabr'skiy | 56.681029 N, 47.678995 E |
| 40 | <i>P. lessonae</i>   | 13,726 | m   | DNA flow cytometry | 23_2015_m  | Kuguvan            | 56.786141 N, 47.784421 E |
| 41 | <i>P. lessonae</i>   | 13,801 | f   | DNA flow cytometry | 25_2015_f  | Chermyshevo        | 56.196386 N, 46.519268 E |
| 42 | <i>P. esculentus</i> | 14,987 | m   | DNA flow cytometry | 25_2015_m  | Chermyshevo        | 56.196386 N, 46.519268 E |
| 43 | <i>P. ridibundus</i> | 15,981 | f   | DNA flow cytometry | 29_2015_f  | Medvedevo          | 56.641235 N, 47.752490 E |
| 44 | <i>P. esculentus</i> | 14,922 | m   | DNA flow cytometry | 29_2015_m  | Krasnooktyabr'skiy | 56.681029 N, 47.678995 E |
| 45 | <i>P. ridibundus</i> |        | f   | DNA flow cytometry | 33_2015_f  | Medvedevo          | 56.641235 N, 47.752490 E |
| 46 | <i>P. esculentus</i> | 14,975 | m   | DNA flow cytometry | 33_2015_m  | Medvedevo          | 56.641235 N, 47.752490 E |

Frogs additionally used for lampbrush chromosome analysis

| № | Frog`s species       | Genome size | Sex | methods of frogs identification | Frogs id  | Locality    | Coordinates              |
|---|----------------------|-------------|-----|---------------------------------|-----------|-------------|--------------------------|
| 1 | <i>P. esculentus</i> |             | f   | Karyotyping with FISH           | 1K_2017_f | Kuguvan     | 56.786141 N, 47.784421 E |
| 2 | <i>P. esculentus</i> |             | f   | Karyotyping with FISH           | 2K_2017_f | Kuguvan     | 56.786141 N, 47.784421 E |
| 3 | <i>P. esculentus</i> |             | f   | Karyotyping with FISH           | 3K_2017_f | Kuguvan     | 56.786141 N, 47.784421 E |
| 4 | <i>P. esculentus</i> |             | f   | Karyotyping with FISH           | 4K_2017_f | Kuguvan     | 56.786141 N, 47.784421 E |
| 5 | <i>P. esculentus</i> |             | f   | Karyotyping with FISH           | 5K_2017_f | Kuguvan     | 56.786141 N, 47.784421 E |
| 6 | <i>P. esculentus</i> |             | f   | Karyotyping with FISH           | 1N_2017_f | Nol'ka      | 56.584767 N, 47.933461 E |
| 7 | <i>P. esculentus</i> |             | f   | Karyotyping with FISH           | 1M_2017_f | Medvedevo   | 56.641235 N, 47.752490 E |
| 8 | <i>P. esculentus</i> |             | f   | Karyotyping with FISH           | 5_2014_f  | Chermyshevo | 56.196386 N, 46.519268 E |
| 9 | <i>P. esculentus</i> |             | f   | Karyotyping with FISH           | 2_2014_f  | Chermyshevo | 56.196386 N, 46.519268 E |



|              |
|--------------|
| L-E system   |
| R-L-E system |
| L-E system   |
| L-E system   |
| R-L-E system |
| R-L-E system |
| R-L-E system |
| R-L-E system |
| L system     |
| L system     |

|                   |
|-------------------|
|                   |
| Population system |
| L-E system        |
| R-L-E system      |
| R-L-E system      |
| R-L-E system      |
| R-L-E system      |
| L-E system        |
| L-E system        |
| L-E system        |
| L-E system        |
| L-E system        |
| L-E system        |
| L-E system        |
| L-E system        |
| L-E system        |
| L-E system        |
| R-L-E system      |
| R-L-E system      |

|              |
|--------------|
| L-E system   |
| R-L-E system |
| R-L-E system |
| L-E system   |
| L-E system   |
| L-E system   |
| L-E system   |
| L-E system   |
| L-E system   |
| R-L-E system |
| L-E system   |
| R-L-E system |
| L-E system   |
| L-E system   |
| L-E system   |
| R-L-E system |
| L-E system   |
| R-L-E system |
| R-L-E system |
| R-L-E system |
| R-L-E system |
| R-L-E system |
| R-L-E system |
| L-E system   |
| R-L-E system |
| R-L-E system |
| R-L-E system |
| R-L-E system |
| R-L-E system |
| R-L-E system |
| R-L-E system |

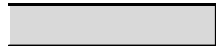

|                   |
|-------------------|
| Population system |
| L-E system        |
| L-E system        |
| L-E system        |
| L-E system        |
| L-E system        |
| R-L-E system      |
| R-L-E system      |
| R-L-E system      |
| R-L-E system      |
