# Supplementary material for: Variation in hybridogenetic hybrid emergence between populations of water frogs from the Pelophylax esculentus complex
Source: PubMed Central journal article supplement (PMC6824575; doi:10.1371/journal.pone.0224759), 2019-11-01
Supplement: pone.0224759.s002.pdf [file pone.0224759.s002.pdf]

**S2 Table 2**

| Crosses type        | Number of analyzed tadpoles | Crosses id | Tadpoles ploidy | Gosner stage | Number of germ cells | Number of cells with micronuclei | Number of micronuclei | Number of micronuclei with signals |
|---------------------|-----------------------------|------------|-----------------|--------------|----------------------|----------------------------------|-----------------------|------------------------------------|
| female RR x male LL | 1                           | 6_2015     | 2n              | 28           | 2                    | no                               |                       |                                    |
|                     | 2                           | 6_2015     | 2n              | 34           | 392                  | 53                               |                       |                                    |
|                     | 3                           | 6_2015     | 2n              | 32           | 255                  | 63                               |                       |                                    |
|                     | 4                           | 6_2015     | 2n              | 31           | 18                   | no                               |                       |                                    |
|                     | 5                           | 6_2015     | 2n              | 31           | 43                   | 2                                |                       |                                    |
|                     | 6                           | 6_2015     | 2n              | 33           | 199                  | 37                               |                       |                                    |
|                     | 7                           | 6_2015     | 2n              | 30           | 1                    | no                               |                       |                                    |
|                     | 8                           | 6_2015     | 2n              | 30           | 7                    | no                               |                       |                                    |
|                     | 9                           | 6_2015     | 2n              | 29           | no                   | no                               |                       |                                    |
|                     | 10                          | 6_2015     | 2n              | 31           | 23                   | 1                                |                       |                                    |
|                     | 11                          | 6_2015     | 2n              | 28           | 1                    | no                               |                       |                                    |
|                     | 12                          | 6_2015     | 2n              | 29           | 1                    | no                               |                       |                                    |
|                     | 13                          | 6_2015     | 2n              | 30           | no                   | no                               |                       |                                    |
|                     | 14                          | 6_2015     | 2n              | 30           | 3                    | no                               |                       |                                    |
|                     | 15                          | 6_2015     | 2n              | 32           | 228                  | 56                               | 81                    | 13                                 |
| female LL x male RR | 1                           | 1_2017     | 2n              | 34           | 744                  | 165                              | 215                   | 27                                 |
|                     | 2                           | 1_2017     | 2n              | 32           | 307                  | 78                               | 100                   | 3                                  |
|                     | 3                           | 1_2017     | 2n              | 29           | 71                   | 27                               | 37                    | 11                                 |
|                     | 4                           | 1_2017     | 2n              | 30           | 137                  | 24                               | 29                    | 3                                  |
|                     | 5                           | 1_2017     | 2n              | 34           | 607                  | 91                               | 111                   | 16                                 |
| female RR x male LL | 1                           | 16_2015    | 2n              | 28           | no                   | no                               |                       |                                    |
|                     | 2                           | 16_2015    | 2n              | 33           | 178                  | 55                               |                       |                                    |
|                     | 3                           | 16_2015    | 2n              | 30           | 1                    | no                               |                       |                                    |
|                     | 4                           | 16_2015    | 2n              | 29           | 21                   | 1                                |                       |                                    |
|                     | 5                           | 16_2015    | 2n              | 30           | no                   | no                               |                       |                                    |
|                     | 6                           | 16_2015    | 2n              | 31           | 21                   | 1                                |                       |                                    |
| female LL x male RL | 1                           | 11_2015    | 2n              | 32           | 11                   | 1                                |                       |                                    |
|                     | 2                           | 11_2015    | 2n              | 30           | 27                   | no                               |                       |                                    |
|                     | 3                           | 11_2015    | 2n              | 31           | 40                   | no                               |                       |                                    |
|                     | 4                           | 11_2015    | 2n              | 32           | 165                  | 66                               | 93                    | 50                                 |

|                     |    |         |    |    |     |     |     |    |
|---------------------|----|---------|----|----|-----|-----|-----|----|
|                     | 5  | 11_2015 | 2n | 33 | 52  | 20  | 24  | 9  |
|                     | 6  | 11_2015 | 2n | 32 | 68  | 41  | 61  | 24 |
| female LL x male RL | 1  | 12_2015 | 2n | 31 | 20  | 2   |     |    |
|                     | 2  | 12_2015 | 2n | 33 | 160 | 15  |     |    |
|                     | 3  | 12_2015 | 2n | 30 | 24  | 7   |     |    |
|                     | 4  | 12_2015 | 2n | 34 | 115 | 58  |     |    |
|                     | 5  | 12_2015 | 2n | 34 | 176 | 69  |     |    |
|                     | 6  | 12_2015 | 2n | 35 | 198 | 40  | 45  | 14 |
|                     | 7  | 12_2015 | 2n | 34 | 252 | 89  | 121 | 23 |
|                     | 8  | 12_2015 | 2n | 32 | 65  | 15  | 21  | 5  |
| female LL x male RL | 1  | 13_2015 | 2n | 32 | 5   | 2   |     |    |
|                     | 2  | 13_2015 | 2n | 32 | 7   | no  |     |    |
|                     | 3  | 13_2015 | 2n | 33 | 413 | 120 | 150 | 26 |
|                     | 4  | 13_2015 | 2n | 34 | 503 | 194 | 267 | 24 |
|                     | 5  | 13_2015 | 2n | 30 | 125 | 40  | 56  | 4  |
| female LL x male RL | 1  | 14_2015 | 2n | 34 | 377 | 96  |     |    |
|                     | 2  | 14_2015 | 2n | 33 | 97  | 38  |     |    |
|                     | 3  | 14_2015 | 2n | 34 | 249 | 76  |     |    |
|                     | 4  | 14_2015 | 2n | 32 | 161 | 22  |     |    |
|                     | 5  | 14_2015 | 2n | 31 | no  |     |     |    |
|                     | 6  | 14_2015 | 2n | 33 | 12  | 2   |     |    |
|                     | 7  | 14_2015 | 2n | 32 | 111 | 11  |     |    |
|                     | 8  | 14_2015 | 2n | 32 | no  |     |     |    |
|                     | 9  | 14_2015 | 2n | 33 | 305 | 74  |     |    |
|                     | 10 | 14_2015 | 2n | 34 | 289 | 38  |     |    |
|                     | 11 | 14_2015 | 2n | 30 | 126 | 53  |     |    |
|                     | 12 | 14_2015 | 2n | 35 | 568 | 108 | 152 | 27 |
|                     | 13 | 14_2015 | 2n | 34 | 358 | 139 | 205 | 23 |
| female LL x male RL | 1  | 26_2015 | 2n | 34 | 428 | 127 | 173 | 41 |
|                     | 2  | 26_2015 | 2n | 34 | 572 | 79  | 96  | 14 |
|                     | 3  | 26_2015 | 2n | 32 | 171 | 14  | 21  | 6  |
|                     | 4  | 26_2015 | 2n | 33 | 217 | 49  | 60  | 11 |
| female LL x male RL | 1  | 27_2015 | 2n | 32 | 73  | 34  |     |    |

|                     |    |         |    |    |     |     |     |    |
|---------------------|----|---------|----|----|-----|-----|-----|----|
|                     | 2  | 27_2015 | 2n | 29 | 25  | 9   |     |    |
|                     | 3  | 27_2015 | 2n | 28 | 23  | 12  |     |    |
|                     | 4  | 27_2015 | 2n | 31 | 55  | 21  |     |    |
|                     | 5  | 27_2015 | 2n | 33 | 109 | 13  |     |    |
| female LL x male RL | 1  | 19_2015 | 2n | 29 | 50  | 23  |     |    |
|                     | 2  | 19_2015 | 2n | 30 | 115 | 6   |     |    |
|                     | 3  | 19_2015 | 2n | 34 | 359 | 34  |     |    |
|                     | 4  | 19_2015 | 2n | 32 | 14  | no  |     |    |
|                     | 5  | 19_2015 | 2n | 32 | 76  | 11  | 13  | 7  |
|                     | 6  | 19_2015 | 2n | 35 | 244 | 106 | 174 | 75 |
|                     | 7  | 19_2015 | 2n | 34 | 137 | 37  | 57  | 22 |
|                     | 8  | 19_2015 | 2n | 29 | 73  | 18  | 26  | 8  |
|                     | 9  | 19_2015 | 2n | 30 | 81  | 26  | 45  | 13 |
|                     | 10 | 19_2015 | 2n | 33 | 239 | 88  | 133 | 51 |
|                     | 11 | 19_2015 | 2n | 31 | 61  | 28  | 42  | 23 |
| female LL x male RL | 1  | 30_2015 | 2n | 35 | 526 | 171 | 233 | 25 |
|                     | 2  | 30_2015 | 2n | 35 | 207 | 22  | 28  | 7  |
|                     | 3  | 30_2015 | 2n | 34 | 342 | 86  | 111 | 17 |
|                     | 4  | 30_2015 | 2n | 32 | 27  | 3   | 5   | no |
|                     | 5  | 30_2015 | 2n | 30 | 15  |     |     |    |
| Female LL x male LL | 1  | 2_2017  | 2n | 34 | 245 |     |     |    |
|                     | 2  | 2_2017  | 2n | 32 | 118 |     |     |    |
|                     | 3  | 2_2017  | 2n | 34 | 184 |     |     |    |
