# Supplementary material for: Variation in hybridogenetic hybrid emergence between populations of water frogs from the Pelophylax esculentus complex
Source: PubMed Central journal article supplement (PMC6824575; doi:10.1371/journal.pone.0224759), 2019-11-01

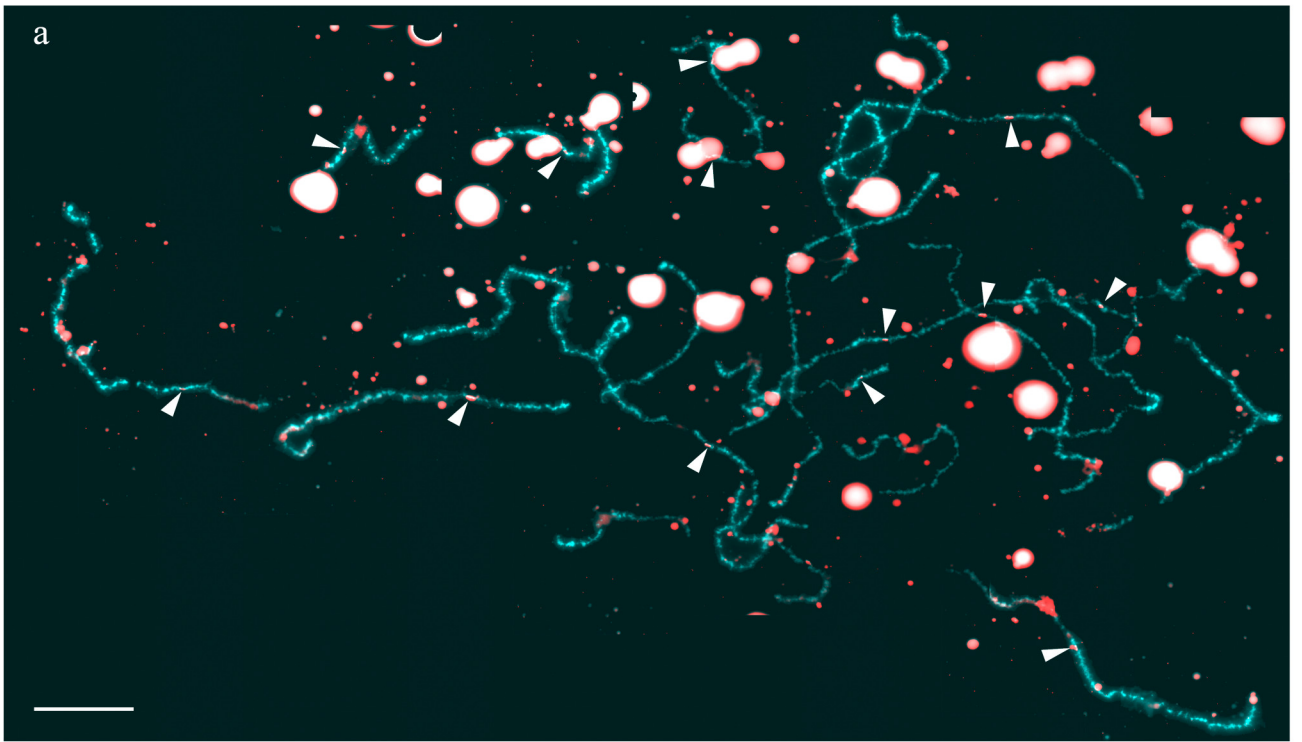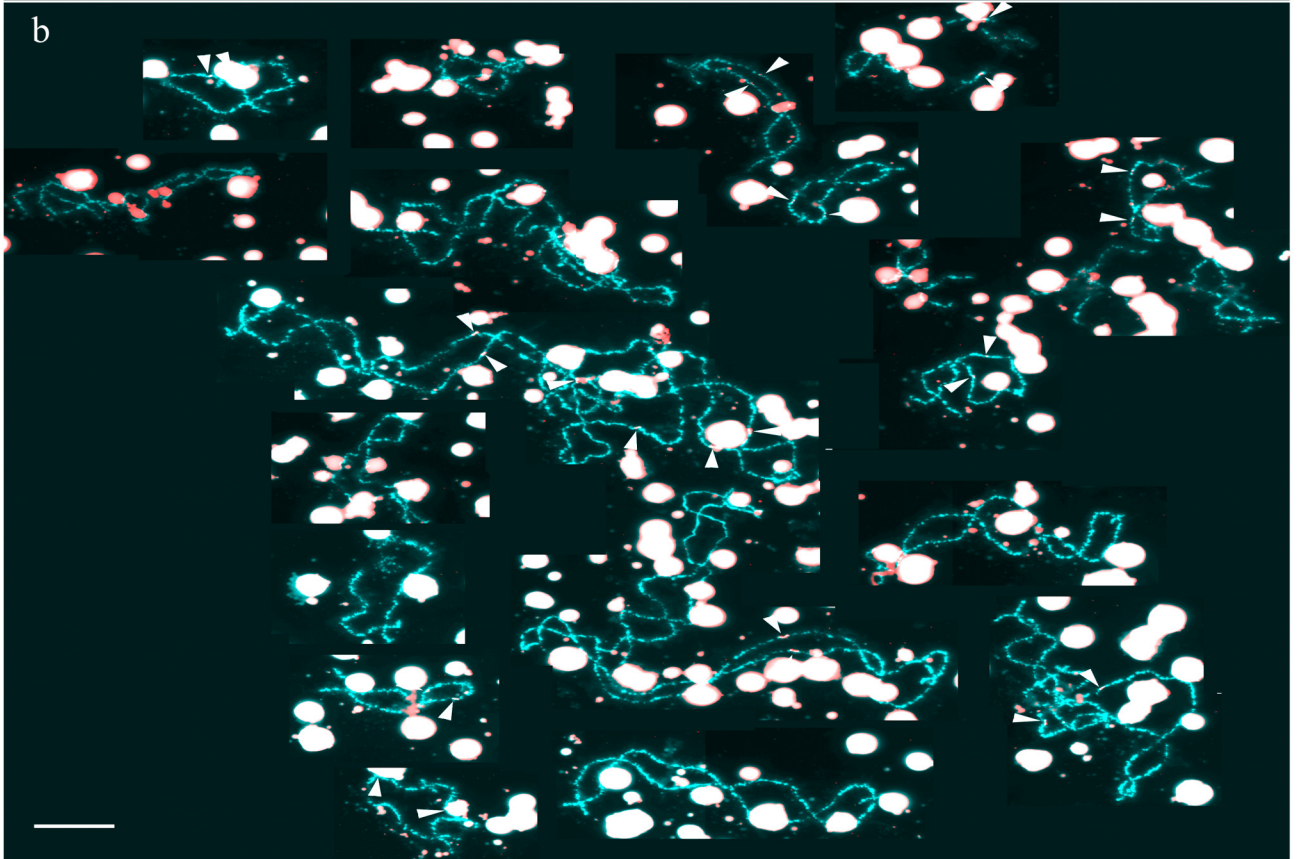

Supplement: pone.0224759.s003.pdf [file pone.0224759.s003.pdf]
